# Supplementary material
Source: Research Square preprint supplement (doi:10.21203/rs.3.rs-8784433/v1)
Supplement: Supplementary file 1 [file 286d9bb0b5eb589317922f95.docx]

**Supplementary Table 1**. **Baseline Characteristics of Lung Transplant Recipients with Acute Respiratory Events**

| **Characteristic** | **Cases (n = 21)** |
| --- | --- |
| Sex, n (%) |  |
| Female | 6 (29) |
| Male | 15 (71) |
| Age, mean (SD), years | 44.9 (12.5) |
| Underlying disease, n (%) |  |
| Interstitial lung diseases (IIPs) | 7 (33) |
| COPD | 1 (5) |
| GVHD | 4 (19) |
| IPAH | 3 (14) |
| Others | 6 (29) |
| Donor type, n (%) |  |
| Living donor | 4 (19) |
| Brain-dead donor | 17 (81) |
| Operative procedure, n (%) |  |
| Single lung transplantation | 11 (52) |
| Bilateral lung transplantation | 10 (48) |
| Time from transplantation to study enrolment, n (%) |  |
| < 1 year | 9 (43) |
| 1–3 years | 6 (29) |
| > 3 years | 6 (29) |
| Acute respiratory events for the hospitalization, n (%) |  |
| Pneumonia | 7 (33%) |
| Acute rejection | 7 (33%) |
| CLAD or RAS | 4 (19%) |
| Pleural effusion | 2 (9.5%) |
| Stent obstruction | 1 (4.8%) |

**Supplementary Figure 1. Schema of Case-Crossover study**


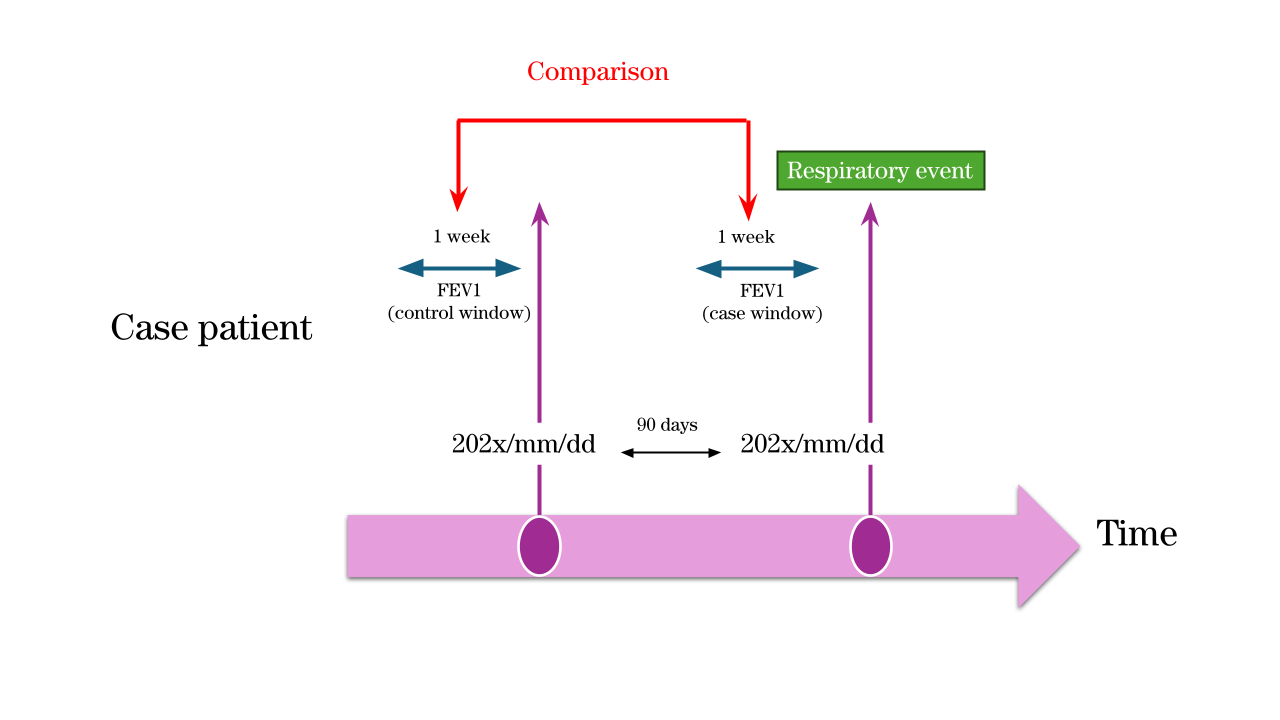
Schematic representation of the case-crossover study design. For each acute respiratory event (index date), the case window was defined as the 7-day period immediately preceding the event. The control window was defined as the 7-day period located 90 days before the event. Within each individual, measurements during the case window were compared with those during the control window to assess within-person differences in algorithm-detected abnormalities while controlling for time-invariant confounders.

**Supplementary Figure 2. Flow Chart of participants**


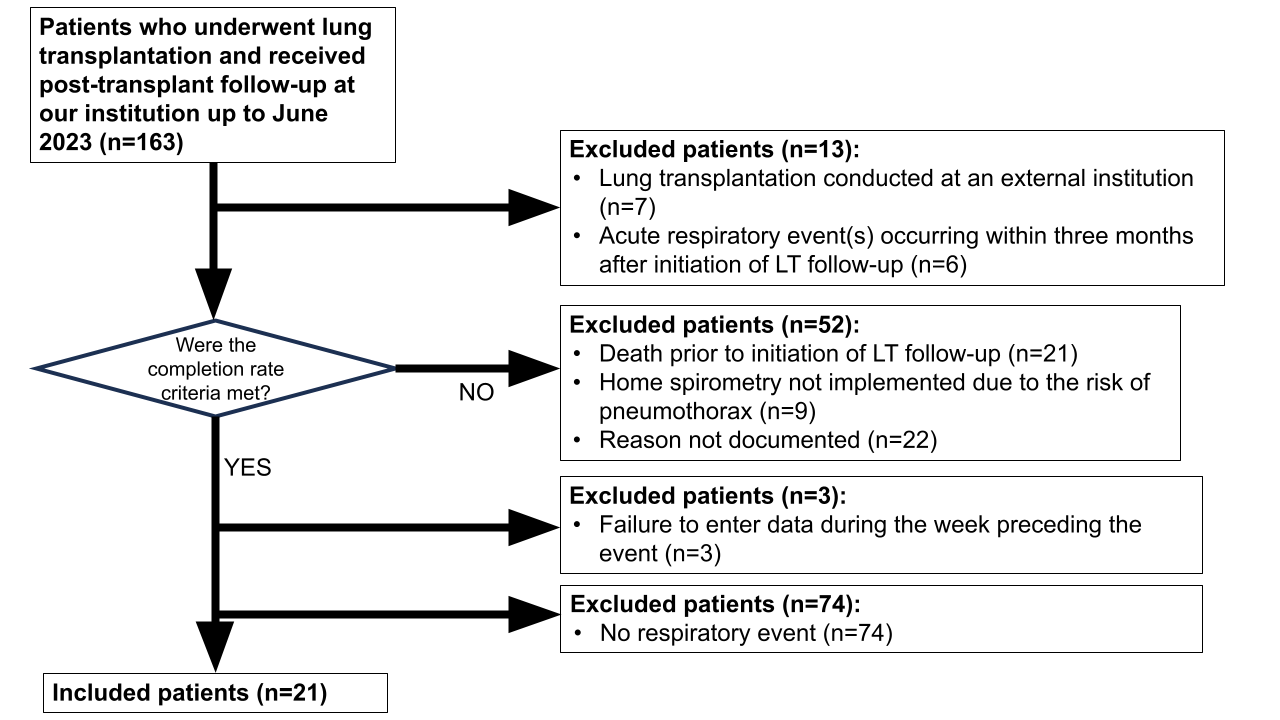


Flow chart illustrating the selection of lung transplant recipients included in the analysis. Among patients enrolled in the LT-FollowUp home spirometry program, those with at least 90 days of post-transplant follow-up data were screened. Episodes with incomplete spirometry records or insufficient baseline data were excluded. Acute respiratory events were identified based on predefined clinical criteria.
